# Supplementary material
Source: publisher figshare collection journal article supplement (https://frontiersin.figshare.com/ndownloader/files/32836133)
Supplement: Supplementary file 1 [file 32836133]

# Supplementary Material

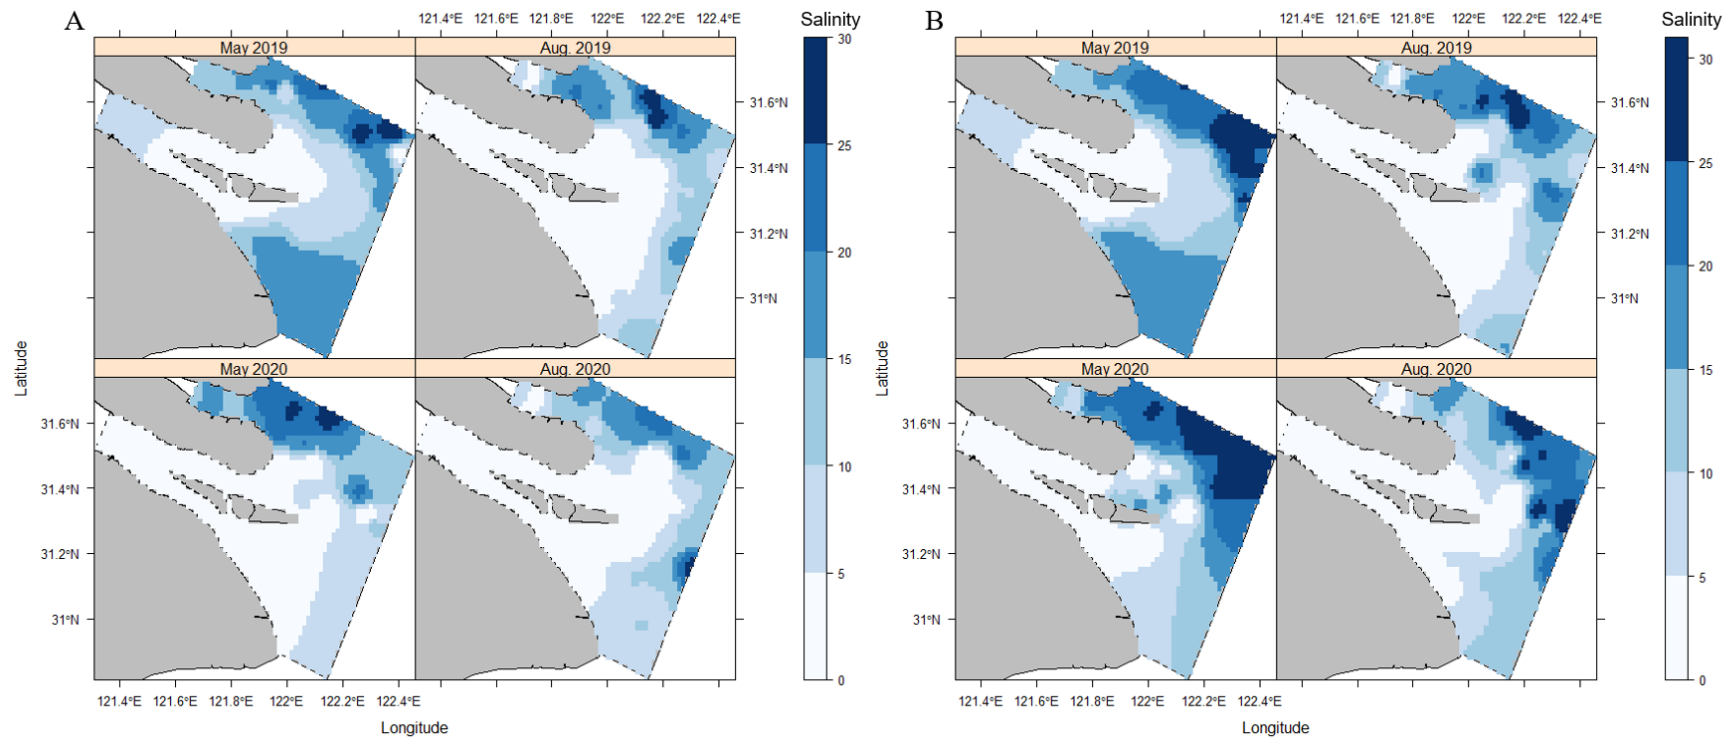

**Supplementary Figure 1.** The maps of interpolated (A) sea surface salinity and (B) sea bottom salinity.
